# Supplementary material for: Prognosis of surgery combined with different adjuvant therapies in esophageal cancer treatment: a network meta-analysis
Source: PubMed Central journal article supplement (PMC5482659; doi:10.18632/oncotarget.16193), 2017-03-14
Supplement: oncotarget-08-36339-s001.pdf [file oncotarget-08-36339-s001.pdf]

# Prognosis of surgery combined with different adjuvant therapies in esophageal cancer treatment: a network meta-analysis

## SUPPLEMENTARY MATERIALS

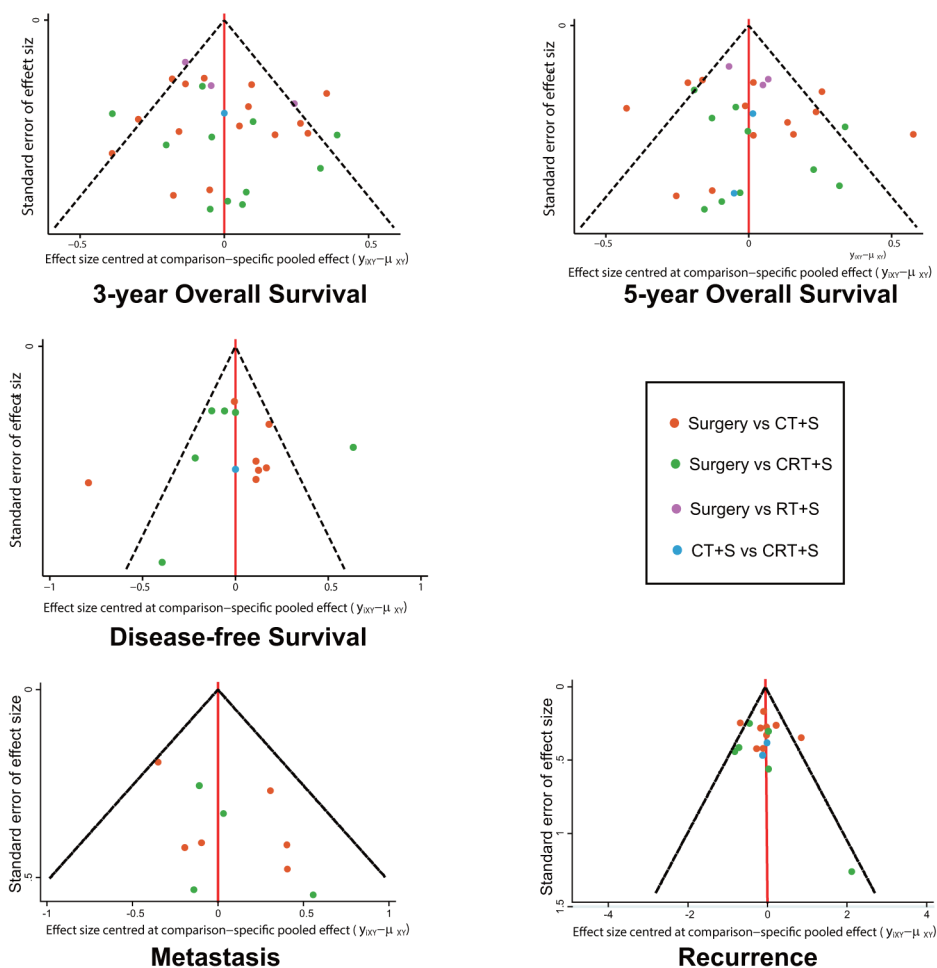

Supplementary Figure 1: Publication bias of overall survival in 3 years and 5 years, disease-free survival, recurrence and metastasis.

Supplementary Table 1: Jadad Scale of 34 included studies

| Study or Subgroup               | Design | Blinding | Withdrawal |
|---------------------------------|--------|----------|------------|
| Law <i>et al.</i> , 1997        | 1      | 0        | 1          |
| Ancona <i>et al.</i> , 2001     | 2      | 0        | 1          |
| Kelsen <i>et al.</i> , 2007     | 2      | 1        | 1          |
| Allum <i>et al.</i> , 2009      | 2      | 1        | 1          |
| Boonstra <i>et al.</i> , 2011   | 2      | 2        | 1          |
| Ando <i>et al.</i> , 2012       | 1      | 0        | 1          |
| Maipang <i>et al.</i> , 1994    | 1      | 0        | 1          |
| Nygaard <i>et al.</i> , 1992    | 1      | 0        | 1          |
| Schlag <i>et al.</i> , 1992     | 1      | 0        | 1          |
| Ychou <i>et al.</i> , 2011      | 2      | 0        | 1          |
| Pouliquen <i>et al.</i> , 1996  | 2      | 0        | 1          |
| Ando <i>et al.</i> , 1997       | 1      | 0        | 1          |
| Ando <i>et al.</i> , 2003       | 1      | 0        | 1          |
| Lee <i>et al.</i> , 2005        | 0      | 0        | 1          |
| Herroor <i>et al.</i> , 2003    | 0      | 0        | 1          |
| Shiozaki <i>et al.</i> , 2004   | 0      | 0        | 1          |
| Zhang <i>et al.</i> , 2008      | 0      | 0        | 1          |
| Walsh <i>et al.</i> , 1996      | 1      | 0        | 1          |
| Urba <i>et al.</i> , 2001       | 1      | 0        | 1          |
| Stahl <i>et al.</i> , 2009      | 2      | 0        | 1          |
| Burmeister <i>et al.</i> , 2011 | 2      | 0        | 1          |
| Tepper <i>et al.</i> , 2008     | 1      | 0        | 1          |
| van Hagen <i>et al.</i> , 2012  | 1      | 0        | 1          |
| Burmeister <i>et al.</i> , 2005 | 2      | 0        | 1          |
| Lv <i>et al.</i> , 2010         | 1      | 0        | 1          |
| Apinop <i>et al.</i> , 1994     | 1      | 0        | 0          |
| Le Prise <i>et al.</i> , 1994   | 1      | 0        | 1          |
| Walsh <i>et al.</i> , 1995      | 1      | 0        | 1          |
| Mariette <i>et al.</i> , 2014   | 2      | 0        | 1          |
| Kobayashi <i>et al.</i> , 2000  | 2      | 0        | 1          |
| Launois <i>et al.</i> , 1981    | 1      | 0        | 1          |
| Gignoux <i>et al.</i> , 1987    | 2      | 1        | 1          |
| Arnott <i>et al.</i> , 1992     | 2      | 1        | 1          |
| Lee <i>et al.</i> , 2004        | 2      | 1        | 1          |

**Supplementary Table 2: SUCRA of different treatments**

| <b>Treatment</b> | <b>3-year OS</b> | <b>5-year OS</b> | <b>DFS</b> | <b>Recurrence</b> | <b>Metastasis</b> |
|------------------|------------------|------------------|------------|-------------------|-------------------|
| <b>S</b>         | 0.24             | 0.26             | 0.08       | 0.11              | 0.09              |
| <b>CT+S</b>      | 0.53             | 0.65             | 0.45       | 0.47              | 0.61              |
| <b>CRT+S</b>     | 0.99             | 1.00             | 0.97       | 0.93              | 0.80              |
| <b>RT+S</b>      | 0.24             | 0.09             | -          | -                 | -                 |

Abbreviation: OS-Overall survival, DFS-Disease-free survival, CRT-chemoradiotherapy, S-surgery, CT-chemotherapy, RT-radiotherapy
